# Supplementary material for: Altered Phenotype and Enhanced Antibody-Producing Ability of Peripheral B Cells in Mice with Cd19-Driven Cre Expression
Source: MDPI journal article supplement (doi:10.3390/cells11040700), 2022-02-16
Supplement: s1 [file s1]

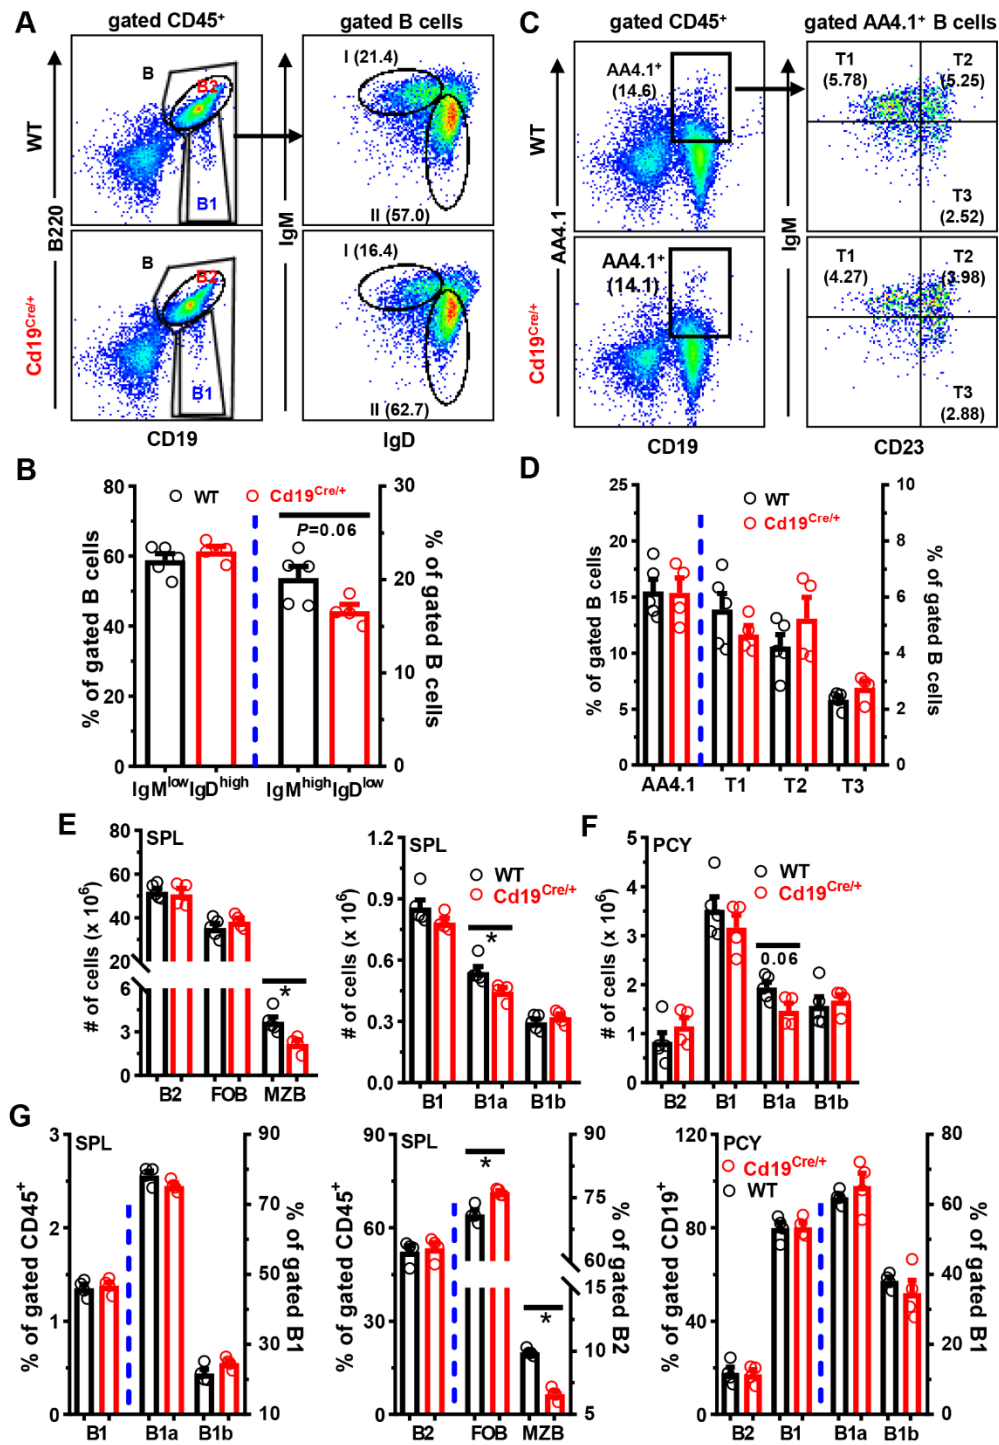

**Supplementary Figure S1. Disturbed phenotypes of peripheral B cells in Cd19<sup>Cre/+</sup> mice.** Cells from the spleens of naive mice were stained with antibodies against CD45/B220/CD19/IgD & IgM (A&B) or CD45/CD19/CD23/AA4.1 & IgM (C&D) followed by analyses on FACS. A&C, representative FACS plots showing the gating strategies for B (CD19<sup>+</sup>), B2 (CD19<sup>+</sup>B220<sup>high</sup>)/B1 (CD19<sup>+</sup>B220<sup>low</sup>) (left panel in A), or IgM<sup>high</sup>IgD<sup>low</sup> (I) & IgM<sup>low</sup>IgD<sup>high</sup> (II) cells within gated CD19<sup>+</sup> B cells (right panel in A), or transitional T1 (CD19<sup>+</sup>AA4.1<sup>+</sup>IgM<sup>high</sup>CD23<sup>low</sup>), T2 (CD19<sup>+</sup>AA4.1<sup>+</sup>IgM<sup>high</sup>CD23<sup>high</sup>) & T3 (CD19<sup>+</sup>AA4.1<sup>+</sup>IgM<sup>low</sup>CD23<sup>high</sup>) B cells (C) in WT vs. Cd19<sup>Cre/+</sup> mice. Numbers in brackets indicated the percentages of gated subsets within B cells. B&D, bar graphs showing the percent of IgM<sup>high</sup>IgD<sup>low</sup> & IgM<sup>low</sup>IgD<sup>high</sup> (B) or AA4.1<sup>+</sup>, T1, T2 & T3 (D) cells within gated B cells in spleens of mice. E&F, numbers of indicated B-cell subsets in the spleens (SPL, E) or peritoneal cavities (PCY, F) of mice (female, 8-10 weeks; n=5/4 for WT/Cd19<sup>Cre/+</sup> group, respectively). G, bar graphs showing the percent of indicated B-cell subsets in the SPL or PCY of aged WT vs. Cd19<sup>Cre/+</sup> mice (female, 16 weeks old, n=4 for each genotype). B-cell subsets were gated as illustrated in Figure 2A&C. Each symbol represented one single mouse, and results were expressed as mean  $\pm$  SEM (B, D-G). \* $P < 0.05$ .

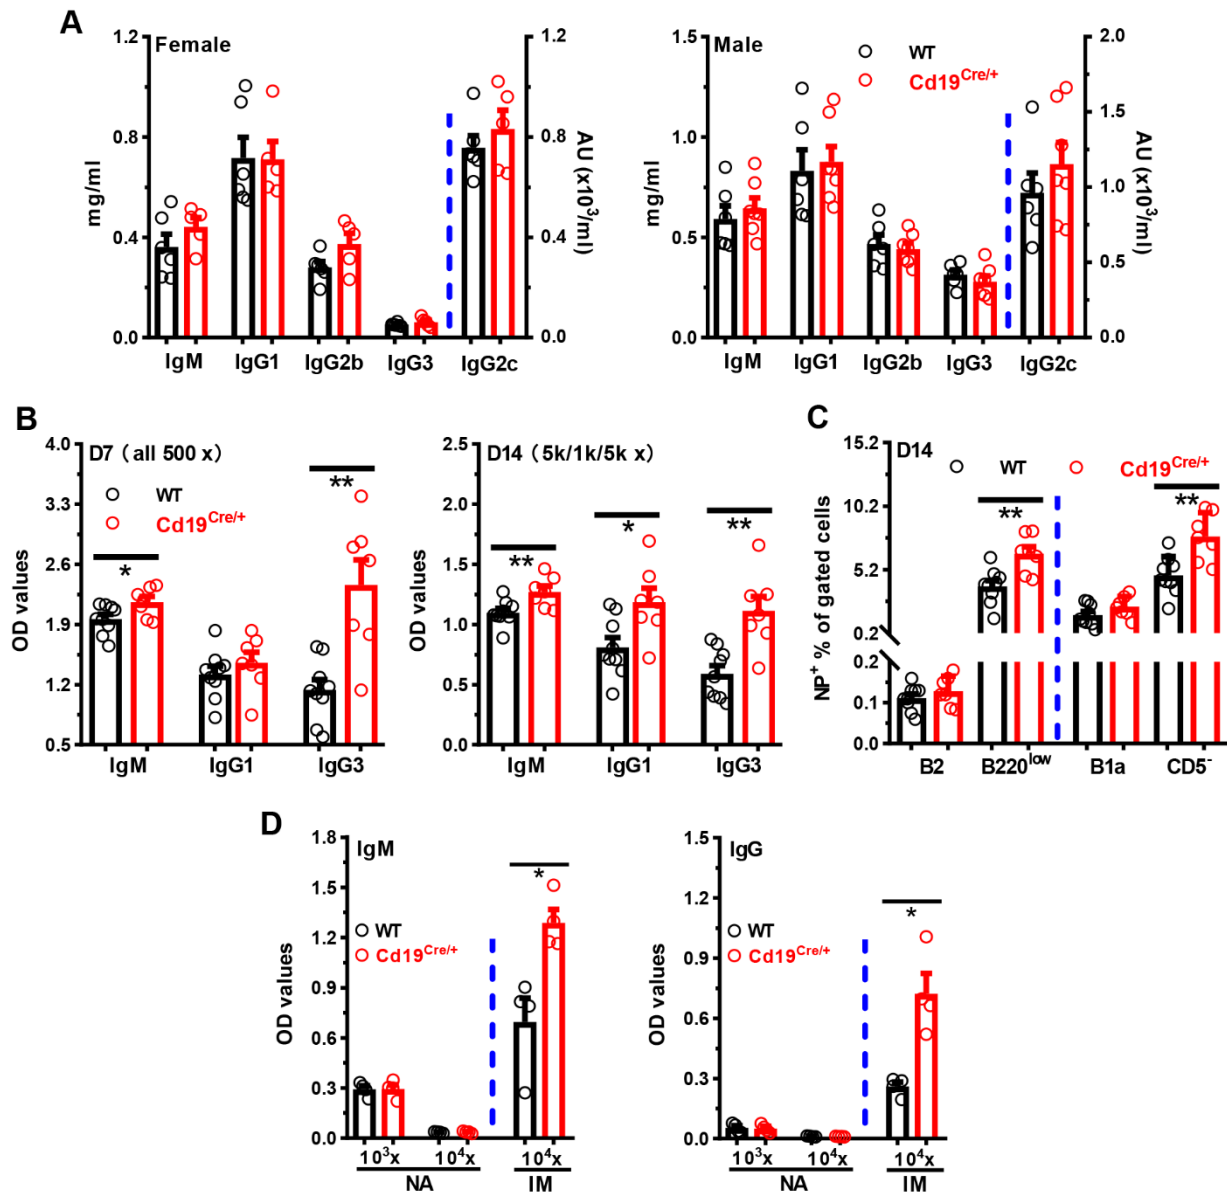

**Supplementary Figure S2. Normal baseline sera antibody levels but enhanced humoral immune responses after immunization in Cd19<sup>Cre/+</sup> mice.** **A**, bar graphs showing levels of total IgM, IgG1, IgG2b, IgG3 and IgG2c in sera of female (~ 8 weeks old, n=6/5 for WT/Cd19<sup>Cre/+</sup>, respectively) or male (8-10 weeks old, n=6/7 for WT/Cd19<sup>Cre/+</sup>, respectively) mice. **B**, bar graphs showing levels of NP-specific IgM, IgG1 & IgG3 in sera of male WT or Cd19<sup>Cre/+</sup> mice on D7 & D14 post immunization. **C**, a bar graph showing the percent of NP<sup>+</sup> cells within gated blood B2 (CD19<sup>+</sup>B220<sup>high</sup>), B220<sup>low</sup> (CD19<sup>+</sup>B220<sup>low</sup>), B1a (CD19<sup>+</sup>B220<sup>low</sup>CD5<sup>+</sup>) or CD5<sup>-</sup>(CD19<sup>+</sup>B220<sup>low</sup>CD5<sup>-</sup>) B cells in male mice on D14 post immunization. Mice (male, 11-13 weeks old, n=9/7 for WT/Cd19<sup>Cre/+</sup>, respectively) were immunized with NP-Ficoll (10  $\mu$ g/100 $\mu$ l/mouse in PBS) intraperitoneally on D0 (**B&C**). **D**, bar graphs showing levels of NP-specific IgM & IgG in sera of naive (NA) or NP-Ficoll immunized (IM) WT or Cd19<sup>Cre/+</sup> mice (male, ~12 weeks old, n=4 for each genotype). Numbers in the upper left corner (**B**) or below bars (**D**) indicated the dilutions of sera for detection of each antibody subtype. Each symbol represented one single mouse of the indicated genotype, and results were expressed as mean  $\pm$ SEM. \*  $P < 0.05$ ; \*\*  $P < 0.01$ .

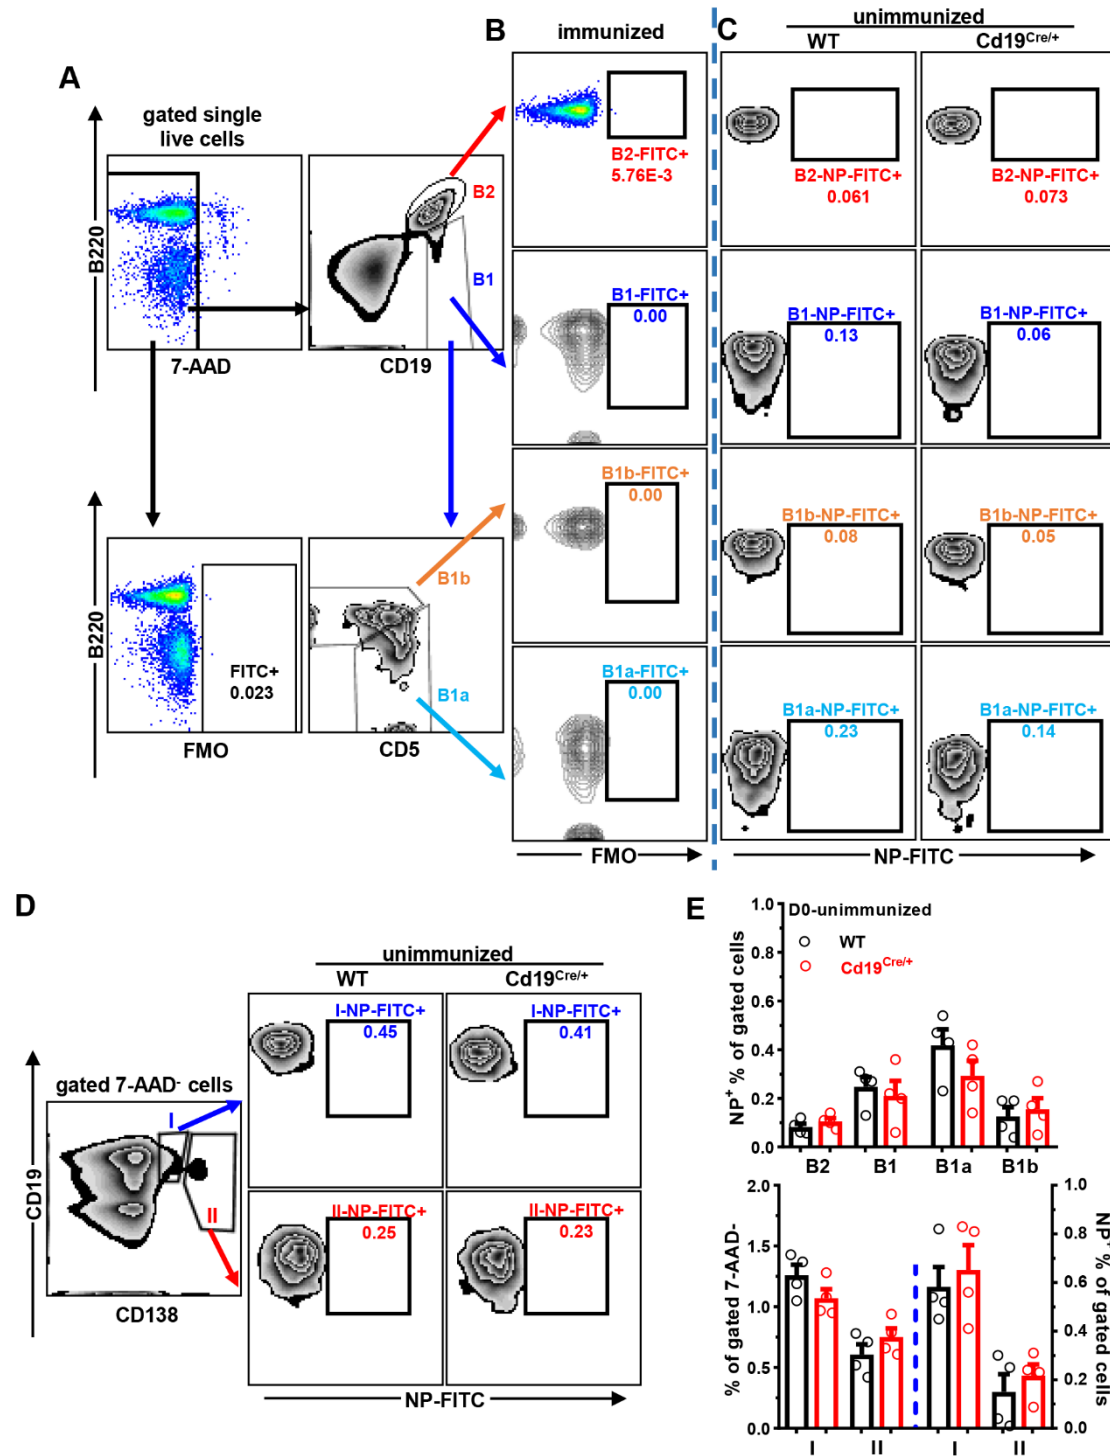

**Supplementary Figure S3. Comparable background stainings of NP-Ficoll in unimmunized WT vs. *Cd19<sup>Cre/+</sup>* mice.** Splenic or blood cells were stained with antibodies against CD45/B220/CD19/CD5 (**A-C**) or CD45/CD19/CD138 (**D**) plus 7-AAD and NP-FITC. **A**, representative FACS plots showing the gating strategies for B2, B1, B1a or B1b cells. **B**, representative FACS plots illustrating the signal in FITC channel in cells from an immunized WT mice (depicted in Figure 4) stained with all antibodies but without NP-FITC (FMO, fluorescence minus one/FITC). **C&D**, representative FACS plots showing percent of NP-FITC<sup>+</sup> cells within gated B2 (B2-NP-FITC<sup>+</sup>), B1 (B1-NP-FITC<sup>+</sup>), B1a (B1a-NP-FITC<sup>+</sup>) & B1b (B1b-NP-FITC<sup>+</sup>) (**C**), or gated CD19<sup>+</sup>CD138<sup>low</sup> (I-NP-FITC<sup>+</sup>)/CD19<sup>low</sup>CD138<sup>high</sup> (II-NP-FITC<sup>+</sup>) (**D**) in unimmunized WT vs. *Cd19<sup>Cre/+</sup>* mice. **E**, bar graphs showing the percent of NP<sup>+</sup> cells within gated B-cell subsets or frequencies of CD19<sup>+</sup>CD138<sup>low</sup> (I)/CD19<sup>low</sup>CD138<sup>high</sup> (II) in the two groups of mice (female, 12 weeks old, n=4 for each genotype). Each symbol represented one single mouse of the indicated genotype, and results were expressed as mean  $\pm$  SEM (**E**).

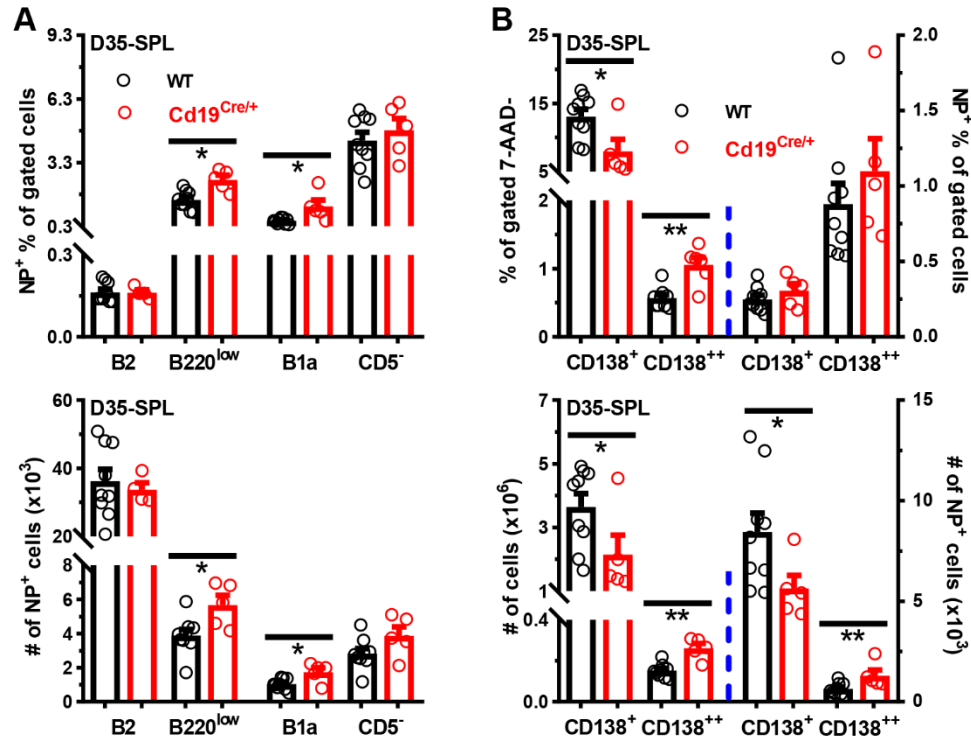

**Supplementary Figure S4. Increased numbers of NP<sup>+</sup> B cells in spleens of Cd19<sup>Cre/+</sup> mice immunized with NP-Ficoll.** Mice (female, ~ 10 weeks of age) were immunized with NP-Ficoll (10 µg/100µl/mouse in PBS) intraperitoneally on D0. Cells in spleens (SPL) on D35 post immunization were stained with 7-AAD, NP-FITC plus antibodies against B220/CD19/CD5 & CD138. **A**, bar graphs showing the percent (*upper panel*) and numbers (*low panel*) of NP<sup>+</sup> cells within gated CD19<sup>+</sup>B220<sup>high</sup> B2, CD19<sup>+</sup>B220<sup>low</sup> (B220<sup>low</sup>), CD19<sup>+</sup>B220<sup>low</sup>CD5<sup>+</sup> B1a or CD19<sup>+</sup>B220<sup>low</sup>CD5<sup>-</sup> (CD5<sup>-</sup>) B cells in WT vs. Cd19<sup>Cre/+</sup> mice. **B**, bar graphs showing the percent (*upper panel*) and numbers (*low panel*) of CD19<sup>+</sup>CD138<sup>low</sup> (CD138<sup>+</sup>)/CD19<sup>+</sup>CD138<sup>high</sup> (CD138<sup>++</sup>) or NP<sup>+</sup> cells within gated CD138<sup>+</sup>/CD138<sup>++</sup> B cells in the two groups of mice. Each symbol represented one single mouse of the indicated genotype (n=9/5 for WT/Cd19<sup>Cre/+</sup> group, respectively), and results were expressed as mean ± SEM. \* *P* < 0.05; \*\* *P* < 0.01.

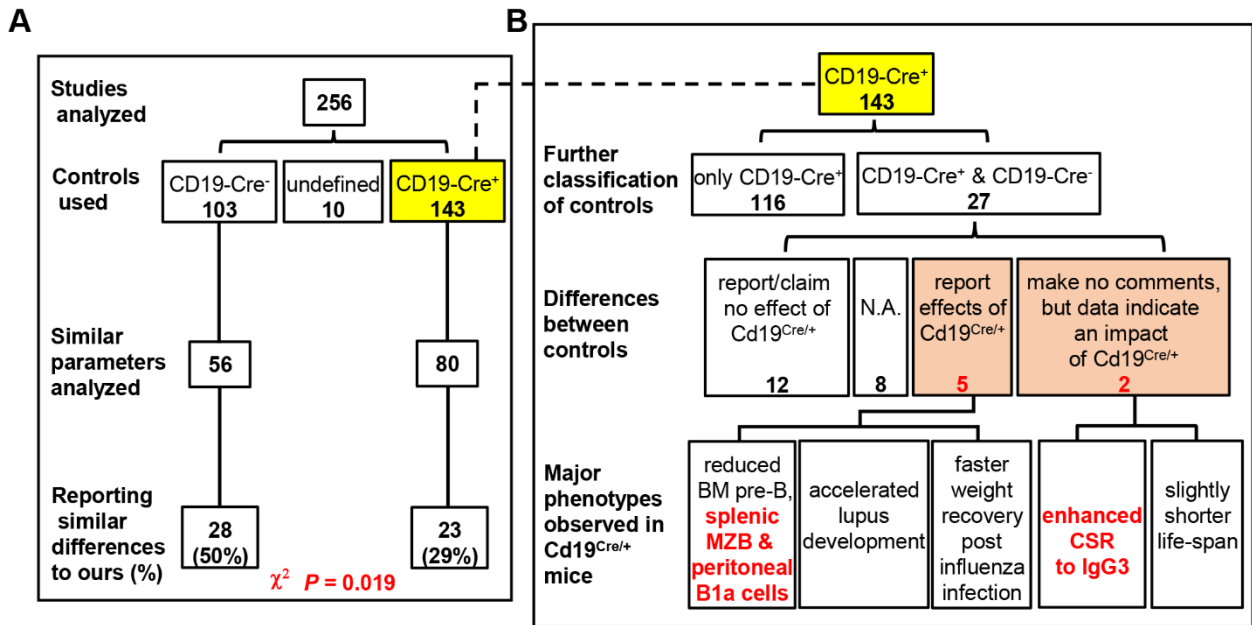

**Supplementary Figure S5. Survey of studies.** In total 256 articles (Supplementary File 1) where the *Cd19<sup>Cre/+</sup>* transgene was used to delete loxp-flanked sequence in B cells were analyzed, among which 10 studies contained no information on control mice or used pooled mice with different genotypes as the control group (undefined in A). CD19-Cre<sup>-</sup> control mice, including WT (*gene<sup>+/+</sup>*), floxed hemizygotes (*gene<sup>fl/+</sup>*) or homozygotes (*gene<sup>fl/fl</sup>*), were used in 103 studies, whereas mice with one *Cd19<sup>Cre/+</sup>* knockin allele (CD19-Cre<sup>+</sup>) in combination with WT or floxed heterozygous (*gene<sup>fl/+</sup>*) alleles were included as controls in the remaining 143 papers. Within these 246 articles, 136 (56 out of 103 using CD19-Cre<sup>-</sup> and 80 out of 143 using CD19-Cre<sup>+</sup> mice as controls, respectively) studies contained the necessary information allowing for comparisons between the control and *Cd19<sup>Cre/+</sup>gene<sup>fl/+</sup>* or *Cd19<sup>Cre/+</sup>gene<sup>fl/fl</sup>* mice in at least one of the following parameters: percent/numbers of MZB & B1a cells, or antibody levels *in vitro/vivo*. At least one of the following differences was present for the results reported to be considered similar (to the phenotype of Cd19<sup>Cre/+</sup> mice described in this manuscript): reduced MZB or B1a cells, and increased antibody levels in sera or culture supernatants.  $\chi^2$  tests were employed to compare the results from published articles using CD19-Cre<sup>-</sup> (56) or CD19-Cre<sup>+</sup> (80) mice as controls (A). B, major impacts of the single *Cd19<sup>Cre/+</sup>* knockin allele reported in the literatures. Among 27 studies using both CD19-Cre<sup>+</sup> & CD19-Cre<sup>-</sup> mice as controls, 5 studies reported significant differences between the two types of controls used, while data in two other publications indicated an augmented CSR to IgG3 of B cells or a reduced long-term survival rate in mice with a *Cd19<sup>Cre/+</sup>* knockin allele. N.A.: no assessment on the impact of *Cd19<sup>Cre/+</sup>* transgene could be made as *Cd19<sup>Cre/+</sup>gene<sup>fl/+</sup>* heterozygotes and CD19-Cre<sup>-</sup> mice were used as controls.
